# Supplementary material for: The impact of virtual and augmented reality on presence, user experience and performance of Information Visualisation
Source: Springer Nature journal article supplement (doi:10.1007/s10055-024-01032-w), 2024-07-09
Supplement: 10055_2024_1032_MOESM1_ESM.pdf [file 10055_2024_1032_MOESM1_ESM.pdf]

## Experiment Task List

*Task list for AR and VR*

| Experiment Task List           |                                                                                                                                                                                       |
|--------------------------------|---------------------------------------------------------------------------------------------------------------------------------------------------------------------------------------|
| Task Category                  | Instructions for AR                                                                                                                                                                   |
| <b>Comfort</b>                 | Are the glasses fitting well? Too tight too loose?                                                                                                                                    |
|                                | Is the sound too loud or soft?                                                                                                                                                        |
|                                | Can you hear my voice clearly?                                                                                                                                                        |
| <b>Training</b>                | Look around you for a cube with three coloured arrows inside it. Pinch the cube with two hands and roll it around to change the data set. Bring the data set into a comfortable view. |
|                                | Chose a data point of any colour and pinch it with your fingers to pick it up. Move your hand around and then let it go.                                                              |
| <b>Experimental Navigation</b> | Tap on the individual patient button and look for the new window.                                                                                                                     |
| Navigation                     | Pick up any data point and drag it into the grey panel in the new window.                                                                                                             |
| Reading                        | What is the sex and risk category of the patient?                                                                                                                                     |
| Interpret                      | Looking at the bottom chart... what two gene types show the highest gene expression values?                                                                                           |
| Interpret                      | What gene shows the lowest gene expression value?                                                                                                                                     |
| Navigation                     | Close the individual patient button by pressing the button again.                                                                                                                     |
| Navigation                     | Open the patient-to-patient button                                                                                                                                                    |
| Navigation                     | Select and drag a red data point to the grey panel. Now select another red point which is close to the first one you added and drag it to the other grey panel.                       |
| Interpret                      | Are there any similarities? Y / N                                                                                                                                                     |
| Interpret                      | What is the similarity between these two patients?                                                                                                                                    |
| Reading                        | What is the R2 Value in the scatterplot?                                                                                                                                              |
| Navigation                     | Select a green data point and replace the right-hand side patient with it.                                                                                                            |
| Interpret                      | Did the R2 value increase or decrease?                                                                                                                                                |
| Navigation                     | Close the patient-to-patient window                                                                                                                                                   |
| Navigation                     | Open the patient to group button                                                                                                                                                      |
| Navigation                     | Drag 4 green patients to the group panel                                                                                                                                              |
| Reading                        | Looking at the left-hand column in the heat map table for gene type and along the top for the patient. Which patient shows the highest value for the CD34 gene?                       |
| Reading                        | Which other patient shows the next highest value?                                                                                                                                     |
| Interpret                      | Looking at the colours as a guide which gene shows a difference between the first high-risk patient and the rest of the patients?                                                     |
| Navigation                     | Select another high-risk patient from the data and drag it into the group                                                                                                             |
| Interpret                      | Which gene stands out for them within the table?                                                                                                                                      |
| Navigation                     | Close the patient-to-group window                                                                                                                                                     |
| Navigation                     | Open select data. Select the data set target two risks                                                                                                                                |
| Navigation                     | Close the select data window                                                                                                                                                          |
| Navigation                     | Open the patient to group window                                                                                                                                                      |
| Navigation                     | Drag a high-risk patient to the left panel and 4 high-risk patients to the right panel                                                                                                |
| Navigation                     | Select the table button in the window that says push me.                                                                                                                              |
| Reading                        | Looking at the table which treatment was most used across the group?                                                                                                                  |
| Interpret                      | Was this treatment successful?                                                                                                                                                        |
| Reading                        | How many of the group are alive?                                                                                                                                                      |

# Full Participant Survey

## Demographics

What is your participant number ?

What is your age?

With what gender do you identify?

- Female
- Male
- Non-binary
- Prefer not to say

What is your prior level of education?

(Please select any that apply)

- Completed HSC or equivalent
- Completed TAFE/Diploma
- Completed University degree

## General experience questions

Approximately how many times have you experienced Virtual Reality (VR)?

- No experience at all
- 1 to 3 times
- 3 to 10 times
- 10 or more times

How comfortable are you with using VR?

- N/A (Never tried it)
- Very Uncomfortable
- Slightly Uncomfortable
- Comfortable
- Very Comfortable

Approximately how many times have you experienced Augmented Reality (AR)?

- No experience at all
- 1 to 3 times
- 3 to 10 times
- 10 or more times

How comfortable are you with using AR?

- N/A (Never tried it)
- Very Uncomfortable
- Slightly Uncomfortable
- Comfortable
- Very Comfortable

## VR Trials

We will now prepare to work with the VR head-mounted display.

**Please let your experimenter know!**

### VR question set

Reflect on your experience using the Data Visualisation Software with the **Oculus Quest Virtual Reality (VR) Headset**.

Where 1 = Do not agree and 5 = Strongly Agree, rate your agreement with the following statements:

|                                                           | 1 (do not agree)      | 2                     | 3                     | 4                     | 5 (strongly agree)    |
|-----------------------------------------------------------|-----------------------|-----------------------|-----------------------|-----------------------|-----------------------|
| I felt very capable and effective at using the software.  | <input type="radio"/> | <input type="radio"/> | <input type="radio"/> | <input type="radio"/> | <input type="radio"/> |
| I felt confident in my ability to use the software.       | <input type="radio"/> | <input type="radio"/> | <input type="radio"/> | <input type="radio"/> | <input type="radio"/> |
| Learning how to use the software was difficult.           | <input type="radio"/> | <input type="radio"/> | <input type="radio"/> | <input type="radio"/> | <input type="radio"/> |
| I found the interface and controls confusing.             | <input type="radio"/> | <input type="radio"/> | <input type="radio"/> | <input type="radio"/> | <input type="radio"/> |
| It was not easy to use this software.                     | <input type="radio"/> | <input type="radio"/> | <input type="radio"/> | <input type="radio"/> | <input type="radio"/> |
| The software provided me with useful options and choices. | <input type="radio"/> | <input type="radio"/> | <input type="radio"/> | <input type="radio"/> | <input type="radio"/> |
| I could get the software to do what I wanted it to do.    | <input type="radio"/> | <input type="radio"/> | <input type="radio"/> | <input type="radio"/> | <input type="radio"/> |
| I felt pressured by the software.                         | <input type="radio"/> | <input type="radio"/> | <input type="radio"/> | <input type="radio"/> | <input type="radio"/> |
| The software felt intrusive.                              | <input type="radio"/> | <input type="radio"/> | <input type="radio"/> | <input type="radio"/> | <input type="radio"/> |
| The software felt controlling.                            | <input type="radio"/> | <input type="radio"/> | <input type="radio"/> | <input type="radio"/> | <input type="radio"/> |
| I felt frustrated when using the software.                | <input type="radio"/> | <input type="radio"/> | <input type="radio"/> | <input type="radio"/> | <input type="radio"/> |

**Reflecting on your experience within the Virtual Reality environment,** please indicate the extent to which your experiences match with the following questions:

In the computer-generated world I had a sense of "being there"...

| 1 (not at all)        | 2                     | 3                     | 4                     | 5 (very much)         |
|-----------------------|-----------------------|-----------------------|-----------------------|-----------------------|
| <input type="radio"/> | <input type="radio"/> | <input type="radio"/> | <input type="radio"/> | <input type="radio"/> |

I felt that the virtual world surrounded me...

| 1 (fully disagree)    | 2                     | 3                     | 4                     | 5 (fully agree)       |
|-----------------------|-----------------------|-----------------------|-----------------------|-----------------------|
| <input type="radio"/> | <input type="radio"/> | <input type="radio"/> | <input type="radio"/> | <input type="radio"/> |

I felt like I was just perceiving pictures.

| 1 (fully disagree)    | 2                     | 3                     | 4                     | 5 (fully agree)       |
|-----------------------|-----------------------|-----------------------|-----------------------|-----------------------|
| <input type="radio"/> | <input type="radio"/> | <input type="radio"/> | <input type="radio"/> | <input type="radio"/> |

I did not feel present in the virtual space.

| 1 (did not feel)      | 2                     | 3                     | 4                     | 5 (felt present)      |
|-----------------------|-----------------------|-----------------------|-----------------------|-----------------------|
| <input type="radio"/> | <input type="radio"/> | <input type="radio"/> | <input type="radio"/> | <input type="radio"/> |

I had a sense of acting in the virtual space, rather than operating something from outside.

| 1 (fully disagree)    | 2                     | 3                     | 4                     | 5 (fully agree)       |
|-----------------------|-----------------------|-----------------------|-----------------------|-----------------------|
| <input type="radio"/> | <input type="radio"/> | <input type="radio"/> | <input type="radio"/> | <input type="radio"/> |

I felt present in the virtual space

|                       |                       |                       |                       |                       |
|-----------------------|-----------------------|-----------------------|-----------------------|-----------------------|
| 1 (fully disagree)    | 2                     | 3                     | 4                     | 5 (fully agree)       |
| <input type="radio"/> | <input type="radio"/> | <input type="radio"/> | <input type="radio"/> | <input type="radio"/> |

How aware were you of the real world surrounding while navigating in the virtual world? (i.e. sounds, room temperature, other people, etc.)?

|                       |                       |                       |                       |                       |
|-----------------------|-----------------------|-----------------------|-----------------------|-----------------------|
| 1 (not at all aware)  | 2                     | 3                     | 4                     | 5 (extremely aware)   |
| <input type="radio"/> | <input type="radio"/> | <input type="radio"/> | <input type="radio"/> | <input type="radio"/> |

I was not aware of my real environment.

|                       |                       |                       |                       |                       |
|-----------------------|-----------------------|-----------------------|-----------------------|-----------------------|
| 1 (fully disagree)    | 2                     | 3                     | 4                     | 5 (fully agree)       |
| <input type="radio"/> | <input type="radio"/> | <input type="radio"/> | <input type="radio"/> | <input type="radio"/> |

I still paid attention to the real environment.

|                       |                       |                       |                       |                       |
|-----------------------|-----------------------|-----------------------|-----------------------|-----------------------|
| 1 (fully disagree)    | 2                     | 3                     | 4                     | 5 (fully agree)       |
| <input type="radio"/> | <input type="radio"/> | <input type="radio"/> | <input type="radio"/> | <input type="radio"/> |

I was completely captivated by the virtual world.

|                       |                       |                       |                       |                       |
|-----------------------|-----------------------|-----------------------|-----------------------|-----------------------|
| 1 (fully disagree)    | 2                     | 3                     | 4                     | 5 (fully agree)       |
| <input type="radio"/> | <input type="radio"/> | <input type="radio"/> | <input type="radio"/> | <input type="radio"/> |

How real did the virtual world seem to you?

|                       |                       |                       |                       |                       |
|-----------------------|-----------------------|-----------------------|-----------------------|-----------------------|
| 1 (completely real)   | 2                     | 3                     | 4                     | 5 (not real at all)   |
| <input type="radio"/> | <input type="radio"/> | <input type="radio"/> | <input type="radio"/> | <input type="radio"/> |

How much did your experience in the virtual environment seem consistent with your real-world experience?

|                       |                       |                       |                       |                       |
|-----------------------|-----------------------|-----------------------|-----------------------|-----------------------|
| 1 (not consistent)    | 2                     | 3                     | 4                     | 5 (very consistent)   |
| <input type="radio"/> | <input type="radio"/> | <input type="radio"/> | <input type="radio"/> | <input type="radio"/> |

How real did the virtual world seem to you?

|                                        |                       |                       |                       |                                           |
|----------------------------------------|-----------------------|-----------------------|-----------------------|-------------------------------------------|
| 1 (about as real as an imagined world) | 2                     | 3                     | 4                     | 5 (indistinguishable from the real world) |
| <input type="radio"/>                  | <input type="radio"/> | <input type="radio"/> | <input type="radio"/> | <input type="radio"/>                     |

The virtual world seemed more realistic than the real world...

|                       |                       |                       |                       |                       |
|-----------------------|-----------------------|-----------------------|-----------------------|-----------------------|
| 1 (fully disagree)    | 2                     | 3                     | 4                     | 5 (fully agree)       |
| <input type="radio"/> | <input type="radio"/> | <input type="radio"/> | <input type="radio"/> | <input type="radio"/> |

**Reflect on your experience using the Oculus Quest Virtual Reality (VR) Headset:**

Did you experience any discomfort while using the Oculus Quest Virtual Reality Headset (e.g., fatigue, eye strain, nausea, headache, or difficulty concentrating)?

- Yes
- No

You answered yes to the previous question, please describe the symptom(s)

What visual design features stood out to you and were they helpful or distracting? (e.g., avatars, buttons etc.)

Was the VR tool useful for performing the patient comparison tasks?

Yes No

#### AR Trials

We will now prepare to work with the AR head-mounted display.

Please let your experimenter know!

#### AR question set

Reflect on your experience using the Data Visualisation Software with the **Microsoft HoloLens Augmented Reality Headset**.

Where 1 = Do not agree and 5 = Strongly Agree, rate your agreement with the following statements:

|                                                           | 1 (do not agree)      | 2                     | 3                     | 4                     | 5 (strongly agree)    |
|-----------------------------------------------------------|-----------------------|-----------------------|-----------------------|-----------------------|-----------------------|
| I felt very capable and effective at using the software   | <input type="radio"/> | <input type="radio"/> | <input type="radio"/> | <input type="radio"/> | <input type="radio"/> |
| I felt confident in my ability to use the software.       | <input type="radio"/> | <input type="radio"/> | <input type="radio"/> | <input type="radio"/> | <input type="radio"/> |
| Learning how to use the software was difficult.           | <input type="radio"/> | <input type="radio"/> | <input type="radio"/> | <input type="radio"/> | <input type="radio"/> |
| I found the interface and controls confusing.             | <input type="radio"/> | <input type="radio"/> | <input type="radio"/> | <input type="radio"/> | <input type="radio"/> |
| It was not easy to use this software.                     | <input type="radio"/> | <input type="radio"/> | <input type="radio"/> | <input type="radio"/> | <input type="radio"/> |
| The software provided me with useful options and choices. | <input type="radio"/> | <input type="radio"/> | <input type="radio"/> | <input type="radio"/> | <input type="radio"/> |
| I could get the software to do what I wanted it to do.    | <input type="radio"/> | <input type="radio"/> | <input type="radio"/> | <input type="radio"/> | <input type="radio"/> |
| I felt pressured by the software.                         | <input type="radio"/> | <input type="radio"/> | <input type="radio"/> | <input type="radio"/> | <input type="radio"/> |
| The software felt intrusive.                              | <input type="radio"/> | <input type="radio"/> | <input type="radio"/> | <input type="radio"/> | <input type="radio"/> |
| The software felt controlling.                            | <input type="radio"/> | <input type="radio"/> | <input type="radio"/> | <input type="radio"/> | <input type="radio"/> |
| I felt frustrated when using the software.                | <input type="radio"/> | <input type="radio"/> | <input type="radio"/> | <input type="radio"/> | <input type="radio"/> |

#### Reflecting on your experience within the Augmented Reality environment,

please indicate the extent to which your experiences match with the following questions:

In the computer-generated world I had a sense of "being there"...

1 (not at all) 2 3 4 5 (very much)

I felt that the virtual world surrounded me...

1 (fully disagree) 2 3 4 5 (fully agree)

I felt like I was just perceiving pictures.

|                       |                       |                       |                       |                       |
|-----------------------|-----------------------|-----------------------|-----------------------|-----------------------|
| 1 (fully disagree)    | 2                     | 3                     | 4                     | 5 (fully agree)       |
| <input type="radio"/> | <input type="radio"/> | <input type="radio"/> | <input type="radio"/> | <input type="radio"/> |

I did not feel present in the virtual space.

|                       |                       |                       |                       |                       |
|-----------------------|-----------------------|-----------------------|-----------------------|-----------------------|
| 1 (did not feel)      | 2                     | 3                     | 4                     | 5 (felt present)      |
| <input type="radio"/> | <input type="radio"/> | <input type="radio"/> | <input type="radio"/> | <input type="radio"/> |

I had a sense of acting in the virtual space, rather than operating something from outside.

|                       |                       |                       |                       |                       |
|-----------------------|-----------------------|-----------------------|-----------------------|-----------------------|
| 1 (fully disagree)    | 2                     | 3                     | 4                     | 5 (fully agree)       |
| <input type="radio"/> | <input type="radio"/> | <input type="radio"/> | <input type="radio"/> | <input type="radio"/> |

I felt present in the virtual space

|                       |                       |                       |                       |                       |
|-----------------------|-----------------------|-----------------------|-----------------------|-----------------------|
| 1 (fully disagree)    | 2                     | 3                     | 4                     | 5 (fully agree)       |
| <input type="radio"/> | <input type="radio"/> | <input type="radio"/> | <input type="radio"/> | <input type="radio"/> |

How aware were you of the real world surrounding while navigating in the virtual world?  
(i.e. sounds, room temperature, other people, etc.)?

|                       |                       |                       |                       |                       |
|-----------------------|-----------------------|-----------------------|-----------------------|-----------------------|
| 1 (not at all aware)  | 2                     | 3                     | 4                     | 5 (extremely aware)   |
| <input type="radio"/> | <input type="radio"/> | <input type="radio"/> | <input type="radio"/> | <input type="radio"/> |

I was not aware of my real environment.

|                       |                       |                       |                       |                       |
|-----------------------|-----------------------|-----------------------|-----------------------|-----------------------|
| 1 (fully disagree)    | 2                     | 3                     | 4                     | 5 (fully agree)       |
| <input type="radio"/> | <input type="radio"/> | <input type="radio"/> | <input type="radio"/> | <input type="radio"/> |

I still paid attention to the real environment.

|                       |                       |                       |                       |                       |
|-----------------------|-----------------------|-----------------------|-----------------------|-----------------------|
| 1 (fully disagree)    | 2                     | 3                     | 4                     | 5 (fully agree)       |
| <input type="radio"/> | <input type="radio"/> | <input type="radio"/> | <input type="radio"/> | <input type="radio"/> |

I was completely captivated by the virtual world.

|                       |                       |                       |                       |                       |
|-----------------------|-----------------------|-----------------------|-----------------------|-----------------------|
| 1 (fully disagree)    | 2                     | 3                     | 4                     | 5 (fully agree)       |
| <input type="radio"/> | <input type="radio"/> | <input type="radio"/> | <input type="radio"/> | <input type="radio"/> |

How real did the virtual world seem to you?

|                       |                       |                       |                       |                       |
|-----------------------|-----------------------|-----------------------|-----------------------|-----------------------|
| 1 (completely real)   | 2                     | 3                     | 4                     | 5 (not real at all)   |
| <input type="radio"/> | <input type="radio"/> | <input type="radio"/> | <input type="radio"/> | <input type="radio"/> |

How much did your experience in the virtual environment seem consistent with your real-world experience?

|                       |                       |                       |                       |                       |
|-----------------------|-----------------------|-----------------------|-----------------------|-----------------------|
| 1 (not consistent)    | 2                     | 3                     | 4                     | 5 (very consistent)   |
| <input type="radio"/> | <input type="radio"/> | <input type="radio"/> | <input type="radio"/> | <input type="radio"/> |

How real did the virtual world seem to you?

|                                        |                       |                       |                       |                                           |
|----------------------------------------|-----------------------|-----------------------|-----------------------|-------------------------------------------|
| 1 (about as real as an imagined world) | 2                     | 3                     | 4                     | 5 (indistinguishable from the real world) |
| <input type="radio"/>                  | <input type="radio"/> | <input type="radio"/> | <input type="radio"/> | <input type="radio"/>                     |

The virtual world seemed more realistic than the real world...

1 (fully disagree)    2    3    4    5 (fully agree)

              

**Reflect on your experience using the Microsoft HoloLens Augmented Reality (AR) Headset:**

Did you experience any discomfort while using the Microsoft HoloLens Augmented Reality Headset (e.g., fatigue, eye strain, nausea, headache, or difficulty concentrating)?

- Yes  
 No

You answered yes to the previous question, please describe the symptom(s)

Did you find that the real world background was distracting when completing tasks in the AR environment?

- Yes    No
- 

Please describe how it felt to have a view of both the real and virtual world at the same time.

**AR & VR comparison**

Which headset did you prefer to use when completing the assigned tasks?

- Oculus Quest Virtual Reality Headset    Microsoft HoloLens Augmented Reality Headset
- 

Why did you find this to be your preferred headset?

Which headset do you believe would be more practical to use in a work setting? (e.g., office, clinic)

- Oculus Quest Virtual Reality Headset    Microsoft HoloLens Augmented Reality Headset
- 

Why do you think your preferred headset would be more practical?

What did you think about the music and sound effects within the program?

Please leave any additional comments you have about using the headsets and/or carrying out the tasks.

## Parametric SPSS Output - Edited

Table F1

### Descriptive Statistics for all Measures Across AR and VR

| Descriptive Statistics |           |           |           |           |            |                |
|------------------------|-----------|-----------|-----------|-----------|------------|----------------|
|                        | N         | Minimum   | Maximum   | Mean      |            | Std. Deviation |
|                        | Statistic | Statistic | Statistic | Statistic | Std. Error | Statistic      |
| AR Presence            | 38        | 16        | 57        | 38.00     | 1.701      | 10.488         |
| VR Presence            | 38        | 29        | 61        | 48.16     | 1.124      | 6.930          |
| AR Navigate (secs)     | 38        | 189.00    | 910.74    | 384.0171  | 31.04354   | 191.36524      |
| VR Navigating (secs)   | 38        | 128.97    | 587.68    | 270.4021  | 19.39233   | 119.54234      |
| AR Reading (secs)      | 38        | 34.11     | 174.85    | 80.6134   | 5.93496    | 36.58558       |
| VR Reading (secs)      | 38        | 31.88     | 155.61    | 70.8584   | 4.68946    | 28.90779       |
| AR Interpreting (secs) | 38        | 52.03     | 286.65    | 126.8937  | 8.99766    | 55.46528       |
| VR Interpreting (secs) | 38        | 32.28     | 197.91    | 103.1247  | 6.09636    | 37.58050       |
| AR total time          | 38        | 294.00    | 1105.92   | 588.3892  | 37.07036   | 228.51704      |
| VR total time          | 38        | 192.30    | 697.45    | 377.9447  | 22.84632   | 140.83417      |
| AR Accuracy Rate       | 38        | 83.33     | 100.00    | 93.6866   | .80214     | 4.94474        |
| VR Accuracy Rate       | 38        | 83.33     | 100.00    | 96.4034   | .66990     | 4.12955        |
| AR Autonomy            | 38        | 13        | 25        | 19.79     | .619       | 3.814          |
| VR Autonomy            | 38        | 13        | 25        | 20.92     | .577       | 3.559          |
| AR Competence          | 38        | 9         | 25        | 17.34     | .823       | 5.074          |
| VR Competence          | 38        | 10        | 25        | 20.66     | .620       | 3.822          |
| Valid N (listwise)     | 38        |           |           |           |            |                |

Table F2

### Hypothesis 1 Presence Paired Samples Statistic

| Paired Samples Statistics |             |       |    |                |                 |
|---------------------------|-------------|-------|----|----------------|-----------------|
|                           |             | Mean  | N  | Std. Deviation | Std. Error Mean |
| Pair 1                    | AR Presence | 38.00 | 38 | 10.488         | 1.701           |
|                           | VR Presence | 48.16 | 38 | 6.930          | 1.124           |

Table F3

### Hypothesis 1 Presence Paired Samples Test

| Paired Samples Test |                           |                    |                |                 |                                           |        |        |              |             |             |
|---------------------|---------------------------|--------------------|----------------|-----------------|-------------------------------------------|--------|--------|--------------|-------------|-------------|
|                     |                           | Paired Differences |                |                 |                                           |        |        | Significance |             |             |
|                     |                           | Mean               | Std. Deviation | Std. Error Mean | 95% Confidence Interval of the Difference |        | t      | df           | One-Sided p | Two-Sided p |
|                     |                           |                    |                |                 | Lower                                     | Upper  |        |              |             |             |
| Pair 1              | AR Presence - VR Presence | -10.158            | 10.691         | 1.734           | -13.672                                   | -6.644 | -5.857 | 37           | <.001       | <.001       |

Table F4



## Hypothesis 1 Presence Paired Samples Effect Sizes

**Paired Samples Effect Sizes**

|        |                           | Standardizer <sup>a</sup> | Point Estimate | 95% Confidence Interval |        |       |
|--------|---------------------------|---------------------------|----------------|-------------------------|--------|-------|
|        |                           |                           |                | Lower                   | Upper  |       |
| Pair 1 | AR Presence - VR Presence | Cohen's d                 | 10.691         | -.950                   | -1.330 | -.561 |
|        |                           | Hedges' correction        | 10.914         | -.931                   | -1.303 | -.550 |

a. The denominator used in estimating the effect sizes.  
 Cohen's d uses the sample standard deviation of the mean difference.  
 Hedges' correction uses the sample standard deviation of the mean difference, plus a correction factor.

## Table F5

## Hypothesis 2 Time Paired Samples Statistics

**Paired Samples Statistics**

|        |               | Mean     | N  | Std. Deviation | Std. Error Mean |
|--------|---------------|----------|----|----------------|-----------------|
| Pair 1 | AR total time | 588.3892 | 38 | 228.51704      | 37.07036        |
|        | VR total time | 377.9447 | 38 | 140.83417      | 22.84632        |

## Table F6

## Hypothesis 2 Time Paired Samples Test

**Paired Samples Test**

|        |                               | Paired Differences |                |                 |                                           | t         | df    | Significance |             |       |
|--------|-------------------------------|--------------------|----------------|-----------------|-------------------------------------------|-----------|-------|--------------|-------------|-------|
|        |                               | Mean               | Std. Deviation | Std. Error Mean | 95% Confidence Interval of the Difference |           |       | One-Sided p  | Two-Sided p |       |
|        |                               |                    |                |                 | Lower                                     |           |       |              |             | Upper |
| Pair 1 | AR total time - VR total time | 210.44447          | 175.94516      | 28.54207        | 152.61274                                 | 268.27621 | 7.373 | 37           | <.001       | <.001 |

## Table F7

## Hypothesis 2 Time Paired Samples Effect Sizes

**Paired Samples Effect Sizes**

|        |                               | Standardizer <sup>a</sup> | Point Estimate | 95% Confidence Interval |       |       |
|--------|-------------------------------|---------------------------|----------------|-------------------------|-------|-------|
|        |                               |                           |                | Lower                   | Upper |       |
| Pair 1 | AR total time - VR total time | Cohen's d                 | 175.94516      | 1.196                   | .773  | 1.609 |
|        |                               | Hedges' correction        | 179.61495      | 1.172                   | .757  | 1.577 |

a. The denominator used in estimating the effect sizes.  
 Cohen's d uses the sample standard deviation of the mean difference.  
 Hedges' correction uses the sample standard deviation of the mean difference, plus a correction factor.

**Table F8***Hypothesis 2 Time Interpreting Paired Samples Statistics*

| Paired Samples Statistics |                        |          |    |                |                 |
|---------------------------|------------------------|----------|----|----------------|-----------------|
|                           |                        | Mean     | N  | Std. Deviation | Std. Error Mean |
| Pair 1                    | AR Interpreting (secs) | 126.8937 | 38 | 55.46528       | 8.99766         |
|                           | VR Interpreting (secs) | 103.1247 | 38 | 37.58050       | 6.09636         |

**Table F9***Hypothesis 2 Time Interpreting Paired Samples Test*

| Paired Samples Test |                                                 |                    |                |                 |                                           |          |       |              |             |             |
|---------------------|-------------------------------------------------|--------------------|----------------|-----------------|-------------------------------------------|----------|-------|--------------|-------------|-------------|
|                     |                                                 | Paired Differences |                |                 |                                           |          |       | Significance |             |             |
|                     |                                                 | Mean               | Std. Deviation | Std. Error Mean | 95% Confidence Interval of the Difference |          | t     | df           | One-Sided p | Two-Sided p |
|                     |                                                 |                    |                |                 | Lower                                     | Upper    |       |              |             |             |
| Pair 1              | AR Interpreting (secs) - VR Interpreting (secs) | 23.76895           | 54.75734       | 8.88281         | 5.77066                                   | 41.76724 | 2.676 | 37           | .006        | .011        |

**Table F10***Hypothesis 2 Time Interpreting Paired Samples Effect Sizes*

| Paired Samples Effect Sizes |                                                 |                    |  |                           |                |                         |       |
|-----------------------------|-------------------------------------------------|--------------------|--|---------------------------|----------------|-------------------------|-------|
|                             |                                                 |                    |  | Standardizer <sup>a</sup> | Point Estimate | 95% Confidence Interval |       |
|                             |                                                 |                    |  |                           |                | Lower                   | Upper |
| Pair 1                      | AR Interpreting (secs) - VR Interpreting (secs) | Cohen's d          |  | 54.75734                  | .434           | .099                    | .764  |
|                             |                                                 | Hedges' correction |  | 55.89944                  | .425           | .097                    | .749  |

a. The denominator used in estimating the effect sizes.

Cohen's d uses the sample standard deviation of the mean difference.

Hedges' correction uses the sample standard deviation of the mean difference, plus a correction factor.

**Table F11***Hypothesis 2 Accuracy Paired Samples Statistics*

| Paired Samples Statistics |                  |         |    |                |                 |
|---------------------------|------------------|---------|----|----------------|-----------------|
|                           |                  | Mean    | N  | Std. Deviation | Std. Error Mean |
| Pair 1                    | AR Accuracy Rate | 93.6866 | 38 | 4.94474        | .80214          |
|                           | VR Accuracy Rate | 96.4034 | 38 | 4.12955        | .66990          |

**Table F12**

*Hypothesis 2 Accuracy Paired Samples Test*

|        |                                     | Paired Samples Test |                |                 |                                           |          |        |    | Significance |             |
|--------|-------------------------------------|---------------------|----------------|-----------------|-------------------------------------------|----------|--------|----|--------------|-------------|
|        |                                     | Paired Differences  |                |                 | 95% Confidence Interval of the Difference |          | t      | df | One-Sided p  | Two-Sided p |
|        |                                     | Mean                | Std. Deviation | Std. Error Mean | Lower                                     | Upper    |        |    |              |             |
| Pair 1 | AR Accuracy Rate - VR Accuracy Rate | -2.71684            | 4.08620        | .66287          | -4.05994                                  | -1.37374 | -4.099 | 37 | <.001        | <.001       |

**Table F13**

*Hypothesis 2 Accuracy Paired Samples Effect Sizes*

|        |                                     | Paired Samples Effect Sizes |                |                         |        |       |
|--------|-------------------------------------|-----------------------------|----------------|-------------------------|--------|-------|
|        |                                     | Standardizer <sup>a</sup>   | Point Estimate | 95% Confidence Interval |        |       |
|        |                                     |                             |                | Lower                   | Upper  |       |
| Pair 1 | AR Accuracy Rate - VR Accuracy Rate | Cohen's d                   | 4.08620        | -.665                   | -1.013 | -.309 |
|        |                                     | Hedges' correction          | 4.17143        | -.651                   | -.992  | -.303 |

a. The denominator used in estimating the effect sizes.  
 Cohen's d uses the sample standard deviation of the mean difference.  
 Hedges' correction uses the sample standard deviation of the mean difference, plus a correction factor.

**Table F14**

*Hypothesis 3 – Autonomy t test Paired Samples Statistics*

|        |             | Paired Samples Statistics |    |                |                 |
|--------|-------------|---------------------------|----|----------------|-----------------|
|        |             | Mean                      | N  | Std. Deviation | Std. Error Mean |
| Pair 1 | AR Autonomy | 19.79                     | 38 | 3.814          | .619            |
|        | VR Autonomy | 20.92                     | 38 | 3.559          | .577            |

**Table F15**

*Hypothesis 3 – Autonomy t test Paired Samples Test*

|        |                           | Paired Samples Test |                |                 |                                           |       |        |    | Significance |             |
|--------|---------------------------|---------------------|----------------|-----------------|-------------------------------------------|-------|--------|----|--------------|-------------|
|        |                           | Paired Differences  |                |                 | 95% Confidence Interval of the Difference |       | t      | df | One-Sided p  | Two-Sided p |
|        |                           | Mean                | Std. Deviation | Std. Error Mean | Lower                                     | Upper |        |    |              |             |
| Pair 1 | AR Autonomy - VR Autonomy | -1.132              | 4.055          | .658            | -2.464                                    | .201  | -1.720 | 37 | .047         | .094        |

**Table F16***Hypothesis 3 Autonomy t test Paired Samples Effect Sizes*

|        |                           | Standardizer <sup>a</sup> | Point Estimate | 95% Confidence Interval |       |
|--------|---------------------------|---------------------------|----------------|-------------------------|-------|
|        |                           |                           |                | Lower                   | Upper |
| Pair 1 | AR Autonomy - VR Autonomy | Cohen's d                 | 4.055          | -.279                   | .047  |
|        |                           | Hedges' correction        | 4.139          | -.273                   | .046  |

a. The denominator used in estimating the effect sizes.

Cohen's d uses the sample standard deviation of the mean difference.

Hedges' correction uses the sample standard deviation of the mean difference, plus a correction factor.

**Table F17***Hypothesis 3 Competence t test Paired Samples Statistics*

|        |               | Mean  | N  | Std. Deviation | Std. Error Mean |
|--------|---------------|-------|----|----------------|-----------------|
| Pair 1 | AR Competence | 17.34 | 38 | 5.074          | .823            |
|        | VR Competence | 20.66 | 38 | 3.822          | .620            |

**Table F18***Hypothesis 3 Competence t test Paired Samples Test*

|        |                               | Paired Differences |                |                 |                                           |        | t      | df | Significance |             |
|--------|-------------------------------|--------------------|----------------|-----------------|-------------------------------------------|--------|--------|----|--------------|-------------|
|        |                               | Mean               | Std. Deviation | Std. Error Mean | 95% Confidence Interval of the Difference |        |        |    | One-Sided p  | Two-Sided p |
|        |                               |                    |                |                 | Lower                                     | Upper  |        |    |              |             |
| Pair 1 | AR Competence - VR Competence | -3.316             | 5.919          | .960            | -5.261                                    | -1.370 | -3.453 | 37 | <.001        | .001        |

**Table F19***Hypothesis 3 Competence t test Paired Samples Effect Sizes*

|        |                               | Standardizer <sup>a</sup> | Point Estimate | 95% Confidence Interval |       |
|--------|-------------------------------|---------------------------|----------------|-------------------------|-------|
|        |                               |                           |                | Lower                   | Upper |
| Pair 1 | AR Competence - VR Competence | Cohen's d                 | 5.919          | -.560                   | -.214 |
|        |                               | Hedges' correction        | 6.042          | -.549                   | -.210 |

a. The denominator used in estimating the effect sizes.

Cohen's d uses the sample standard deviation of the mean difference.

Hedges' correction uses the sample standard deviation of the mean difference, plus a correction factor.

**Table F20***Hypothesis 3 Needs Satisfaction AR Correlations*

|               |                     | Correlations |             |               |
|---------------|---------------------|--------------|-------------|---------------|
|               |                     | AR Presence  | AR Autonomy | AR Competence |
| AR Presence   | Pearson Correlation | --           |             |               |
|               | N                   | 38           |             |               |
| AR Autonomy   | Pearson Correlation | .399*        | --          |               |
|               | Sig. (2-tailed)     | .013         |             |               |
|               | N                   | 38           | 38          |               |
| AR Competence | Pearson Correlation | .466**       | .790**      | --            |
|               | Sig. (2-tailed)     | .003         | <.001       |               |
|               | N                   | 38           | 38          | 38            |

\*. Correlation is significant at the 0.05 level (2-tailed).

\*\* . Correlation is significant at the 0.01 level (2-tailed).

**Table F21***Hypothesis 3 Needs Satisfaction AR Confidence Intervals*

| Confidence Intervals        |                     |                 |                                                  |       |
|-----------------------------|---------------------|-----------------|--------------------------------------------------|-------|
|                             | Pearson Correlation | Sig. (2-tailed) | 95% Confidence Intervals (2-tailed) <sup>a</sup> |       |
|                             |                     |                 | Lower                                            | Upper |
| AR Presence - AR Autonomy   | .399                | .013            | .091                                             | .638  |
| AR Presence - AR Competence | .466                | .003            | .172                                             | .684  |
| AR Autonomy - AR Competence | .790                | <.001           | .629                                             | .886  |

a. Estimation is based on Fisher's r-to-z transformation.

**Table F22***Hypothesis 3 Needs Satisfaction VR Correlations*

|               |                     | Correlations |             |               |
|---------------|---------------------|--------------|-------------|---------------|
|               |                     | VR Presence  | VR Autonomy | VR Competence |
| VR Presence   | Pearson Correlation | --           |             |               |
|               | N                   | 38           |             |               |
| VR Autonomy   | Pearson Correlation | .029         | --          |               |
|               | Sig. (2-tailed)     | .863         |             |               |
|               | N                   | 38           | 38          |               |
| VR Competence | Pearson Correlation | .000         | .777**      | --            |
|               | Sig. (2-tailed)     | 1.000        | <.001       |               |
|               | N                   | 38           | 38          | 38            |

\*\* . Correlation is significant at the 0.01 level (2-tailed).

**Table F23***Hypothesis 3 Needs Satisfaction VR Confidence Intervals*

|                             | <b>Confidence Intervals</b> |                 |                                                  |       |
|-----------------------------|-----------------------------|-----------------|--------------------------------------------------|-------|
|                             | Pearson Correlation         | Sig. (2-tailed) | 95% Confidence Intervals (2-tailed) <sup>a</sup> |       |
|                             |                             |                 | Lower                                            | Upper |
| VR Presence - VR Autonomy   | .029                        | .863            | -.293                                            | .345  |
| VR Presence - VR Competence | .000                        | 1.000           | -.320                                            | .320  |
| VR Autonomy - VR Competence | .777                        | <.001           | .608                                             | .878  |

a. Estimation is based on Fisher's r-to-z transformation.

**Table G1***Hypothesis 2 Total Time Descriptive Statistics (Median)*

| <b>Descriptives</b>              |                                  |             | Statistic | Std. Error |
|----------------------------------|----------------------------------|-------------|-----------|------------|
| AR total time                    | Mean                             |             | 588.3892  | 37.07036   |
|                                  | 95% Confidence Interval for Mean | Lower Bound | 513.2775  |            |
|                                  |                                  | Upper Bound | 663.5009  |            |
|                                  | 5% Trimmed Mean                  |             | 575.7219  |            |
|                                  | Median                           |             | 529.9350  |            |
|                                  | Variance                         |             | 52220.037 |            |
|                                  | Std. Deviation                   |             | 228.51704 |            |
|                                  | Minimum                          |             | 294.00    |            |
|                                  | Maximum                          |             | 1105.92   |            |
|                                  | Range                            |             | 811.92    |            |
|                                  | Interquartile Range              |             | 327.92    |            |
|                                  | Skewness                         |             | .898      | .383       |
|                                  | Kurtosis                         |             | -.059     | .750       |
|                                  | VR total time                    | Mean        |           | 377.9447   |
| 95% Confidence Interval for Mean |                                  | Lower Bound | 331.6537  |            |
|                                  |                                  | Upper Bound | 424.2358  |            |
| 5% Trimmed Mean                  |                                  |             | 370.4580  |            |
| Median                           |                                  |             | 341.4650  |            |
| Variance                         |                                  |             | 19834.264 |            |
| Std. Deviation                   |                                  |             | 140.83417 |            |
| Minimum                          |                                  |             | 192.30    |            |
| Maximum                          |                                  |             | 697.45    |            |
| Range                            |                                  |             | 505.15    |            |
| Interquartile Range              |                                  |             | 201.51    |            |
| Skewness                         |                                  |             | .789      | .383       |
| Kurtosis                         |                                  |             | -.247     | .750       |

**Table G2***Hypothesis 2 Total Time Wilcoxon Signed Ranks Test Statistic***Test Statistics<sup>a</sup>**

|                        | VR total time -<br>AR total time |
|------------------------|----------------------------------|
| Z                      | -4.967 <sup>b</sup>              |
| Asymp. Sig. (2-tailed) | <.001                            |

a. Wilcoxon Signed Ranks Test

b. Based on positive ranks.

**Table G3***Hypothesis 2 Interpreting Time Descriptive Statistics (Median)***Descriptives**

|                        |                                  | Statistic   | Std. Error |  |
|------------------------|----------------------------------|-------------|------------|--|
| AR Interpreting (secs) | Mean                             | 126.8937    | 8.99766    |  |
|                        | 95% Confidence Interval for Mean | Lower Bound | 108.6627   |  |
|                        |                                  | Upper Bound | 145.1247   |  |
|                        | 5% Trimmed Mean                  | 123.1230    |            |  |
|                        | Median                           | 106.1250    |            |  |
|                        | Variance                         | 3076.397    |            |  |
|                        | Std. Deviation                   | 55.46528    |            |  |
|                        | Minimum                          | 52.03       |            |  |
|                        | Maximum                          | 286.65      |            |  |
|                        | Range                            | 234.62      |            |  |
|                        | Interquartile Range              | 76.47       |            |  |
|                        | Skewness                         | 1.090       | .383       |  |
|                        | Kurtosis                         | .726        | .750       |  |
| VR Interpreting (secs) | Mean                             | 103.1247    | 6.09636    |  |
|                        | 95% Confidence Interval for Mean | Lower Bound | 90.7723    |  |
|                        |                                  | Upper Bound | 115.4771   |  |
|                        | 5% Trimmed Mean                  | 102.2644    |            |  |
|                        | Median                           | 97.8800     |            |  |
|                        | Variance                         | 1412.294    |            |  |
|                        | Std. Deviation                   | 37.58050    |            |  |
|                        | Minimum                          | 32.28       |            |  |
|                        | Maximum                          | 197.91      |            |  |
|                        | Range                            | 165.63      |            |  |
|                        | Interquartile Range              | 65.60       |            |  |
|                        | Skewness                         | .420        | .383       |  |
|                        | Kurtosis                         | .108        | .750       |  |

**Table G4***Hypothesis 2 Interpreting Time Wilcoxon Signed Ranks Test Statistic***Test Statistics<sup>a</sup>**

|                        | VR Interpreting (secs) - AR Interpreting (secs) |
|------------------------|-------------------------------------------------|
| Z                      | -2.415 <sup>b</sup>                             |
| Asymp. Sig. (2-tailed) | .016                                            |

a. Wilcoxon Signed Ranks Test

b. Based on positive ranks.



**Table G5***Hypothesis 2 Accuracy Rate Descriptive Statistics (Median)*

|                  |                                  |             | Statistic | Std. Error |
|------------------|----------------------------------|-------------|-----------|------------|
| AR Accuracy Rate | Mean                             |             | 93.6866   | .80214     |
|                  | 95% Confidence Interval for Mean | Lower Bound | 92.0613   |            |
|                  |                                  | Upper Bound | 95.3119   |            |
|                  | 5% Trimmed Mean                  |             | 93.9112   |            |
|                  | Median                           |             | 93.3300   |            |
|                  | Variance                         |             | 24.450    |            |
|                  | Std. Deviation                   |             | 4.94474   |            |
|                  | Minimum                          |             | 83.33     |            |
|                  | Maximum                          |             | 100.00    |            |
|                  | Range                            |             | 16.67     |            |
|                  | Interquartile Range              |             | 6.67      |            |
|                  | Skewness                         |             | -.500     | .383       |
|                  | Kurtosis                         |             | -.412     | .750       |
| VR Accuracy Rate | Mean                             |             | 96.4034   | .66990     |
|                  | 95% Confidence Interval for Mean | Lower Bound | 95.0461   |            |
|                  |                                  | Upper Bound | 97.7608   |            |
|                  | 5% Trimmed Mean                  |             | 96.7544   |            |
|                  | Median                           |             | 96.6700   |            |
|                  | Variance                         |             | 17.053    |            |
|                  | Std. Deviation                   |             | 4.12955   |            |
|                  | Minimum                          |             | 83.33     |            |
|                  | Maximum                          |             | 100.00    |            |
|                  | Range                            |             | 16.67     |            |
|                  | Interquartile Range              |             | 6.67      |            |
|                  | Skewness                         |             | -1.104    | .383       |
|                  | Kurtosis                         |             | 1.058     | .750       |

**Table G6***Hypothesis 2 Accuracy Rate Wilcoxon Signed Ranks Test Statistic***Test Statistics<sup>a</sup>**

|                        | VR Accuracy<br>Rate - AR<br>Accuracy Rate |
|------------------------|-------------------------------------------|
| Z                      | -3.310 <sup>b</sup>                       |
| Asymp. Sig. (2-tailed) | <.001                                     |

a. Wilcoxon Signed Ranks Test

b. Based on negative ranks.

**Table G7***Hypothesis 3 Autonomy Descriptive Statistics (Median)*

|             |                                  |             | Statistic | Std. Error |
|-------------|----------------------------------|-------------|-----------|------------|
| AR Autonomy | Mean                             |             | 19.79     | .619       |
|             | 95% Confidence Interval for Mean | Lower Bound | 18.54     |            |
|             |                                  | Upper Bound | 21.04     |            |
|             | 5% Trimmed Mean                  |             | 19.85     |            |
|             | Median                           |             | 21.00     |            |
|             | Variance                         |             | 14.549    |            |
|             | Std. Deviation                   |             | 3.814     |            |
|             | Minimum                          |             | 13        |            |
|             | Maximum                          |             | 25        |            |
|             | Range                            |             | 12        |            |
|             | Interquartile Range              |             | 7         |            |
|             | Skewness                         |             | -.310     | .383       |
|             | Kurtosis                         |             | -1.251    | .750       |
| VR Autonomy | Mean                             |             | 20.92     | .577       |
|             | 95% Confidence Interval for Mean | Lower Bound | 19.75     |            |
|             |                                  | Upper Bound | 22.09     |            |
|             | 5% Trimmed Mean                  |             | 21.11     |            |
|             | Median                           |             | 22.00     |            |
|             | Variance                         |             | 12.669    |            |
|             | Std. Deviation                   |             | 3.559     |            |
|             | Minimum                          |             | 13        |            |
|             | Maximum                          |             | 25        |            |
|             | Range                            |             | 12        |            |
|             | Interquartile Range              |             | 5         |            |
|             | Skewness                         |             | -.710     | .383       |
|             | Kurtosis                         |             | -.481     | .750       |

**Table G8***Hypothesis 3 Autonomy Wilcoxon Signed Ranks Test Statistic*

| <b>Test Statistics<sup>a</sup></b> |                     |
|------------------------------------|---------------------|
| VR Autonomy - AR Autonomy          |                     |
| Z                                  | -1.757 <sup>b</sup> |
| Asymp. Sig. (2-tailed)             | .079                |

a. Wilcoxon Signed Ranks Test

b. Based on negative ranks.

**Table G9***Hypothesis 3 Competence Descriptive Statistics (Median)*

|               |                                  |             | Statistic | Std. Error |
|---------------|----------------------------------|-------------|-----------|------------|
| AR Competence | Mean                             |             | 17.34     | .823       |
|               | 95% Confidence Interval for Mean | Lower Bound | 15.67     |            |
|               |                                  | Upper Bound | 19.01     |            |
|               | 5% Trimmed Mean                  |             | 17.35     |            |
|               | Median                           |             | 18.00     |            |
|               | Variance                         |             | 25.745    |            |
|               | Std. Deviation                   |             | 5.074     |            |
|               | Minimum                          |             | 9         |            |
|               | Maximum                          |             | 25        |            |
|               | Range                            |             | 16        |            |
|               | Interquartile Range              |             | 8         |            |
|               | Skewness                         |             | .016      | .383       |
|               | Kurtosis                         |             | -1.230    | .750       |
| VR Competence | Mean                             |             | 20.66     | .620       |
|               | 95% Confidence Interval for Mean | Lower Bound | 19.40     |            |
|               |                                  | Upper Bound | 21.91     |            |
|               | 5% Trimmed Mean                  |             | 20.93     |            |
|               | Median                           |             | 21.00     |            |
|               | Variance                         |             |           |            |
|               | Std. Deviation                   |             |           |            |
|               | Minimum                          |             | 10        |            |
|               | Maximum                          |             | 25        |            |
|               | Range                            |             | 15        |            |
|               | Interquartile Range              |             | 7         |            |
|               | Skewness                         |             | -.804     | .383       |
|               | Kurtosis                         |             | .278      | .750       |

**Table G10***Hypothesis 3 Competence Wilcoxon Signed Ranks Test Statistic*

| <b>Test Statistics<sup>a</sup></b> |                                        |
|------------------------------------|----------------------------------------|
|                                    | VR<br>Competence -<br>AR<br>Competence |
| Z                                  | -3.424 <sup>b</sup>                    |
| Asymp. Sig. (2-tailed)             | <.001                                  |

a. Wilcoxon Signed Ranks Test

b. Based on negative ranks.
